# Supplementary material for: Surveillance of low pathogenic novel H7N9 avian influenza in commercial poultry barns: detection of outbreaks and estimation of virus introduction time
Source: PubMed Central journal article supplement (PMC4129106; doi:10.1186/1471-2334-14-427), 2014-08-01

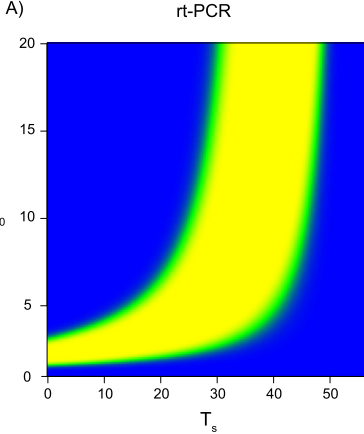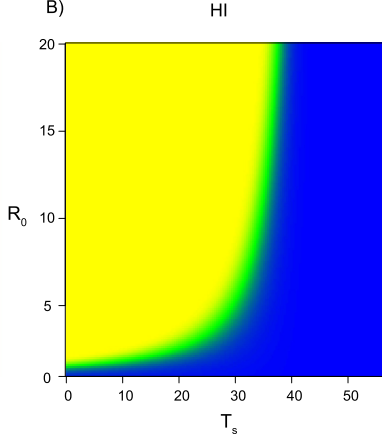

Probability of detecting evidence of infection in at least 1 bird sampled

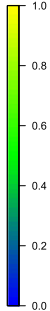

Supplement: 12879_2014_3725_MOESM3_ESM.pdf [file 12879_2014_3725_MOESM3_ESM.pdf]
